# Supplementary material for: Higher Blood Pressure is Associated with Greater White Matter Lesions and Brain Atrophy: A Systematic Review with Meta-Analysis
Source: PubMed Central journal article supplement (PMC7915964; doi:10.3390/jcm10040637), 2021-02-07
Supplement: jcm-10-00637-s001.pdf [file jcm-10-00637-s001.pdf]

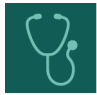

# Higher blood pressure is associated with greater white matter lesions and brain atrophy: a systematic review with meta-analysis acronym defined

Khawlah Alateeq, Erin Walsh, Prof. Nicolas Cherbuin

## Appendix A. Supplemental results

### 1. Magnetic resonance imaging

All studies included in the systematic review were adjusted to account for variation in head size, either in the statistical model or during image processing, by normalization against intracranial volume (ICV, 46 studies), average head size (two studies) [1,2], or skull size (two studies) [3,4].

### 2. BP assessment

Outcome measures included SBP (45%), DBP (39%), PP (8%) and MAP (6.9%). Apart from BP cut-off values, some studies used different values, namely i.e.  $\geq 140/90$ , ( $n=$ ) 150/90 ( $n = 1$ ) [5] 160/95 ( $n = 1$ ) [2] 160/100 ( $n = 2$ ) [6,7] or 160-179/90-99 ( $n = 1$ ) [8] as clinical measures and 135/85 for ABP [9]. Hypertensive participants were below 25% in (29.8% of studies), between 26% to 50% in (49% of studies), and above 50% in (21% of studies).

### 3. BP brain volumes and Age

#### 3.1. BP associations in young adults

Five studies reported association between BP and brain volumes in young adults (18-40 years) [10–14]. Higher BP (SBP,  $n = 15$ ; DBP,  $n = 12$ ) was associated with greater (WMLs,  $n = 2$ [13,14]) and smaller brain volumes (TBV,  $n = 3$  [10,13,14]; GMV,  $n = 2$  [10,12]; WMV,  $n = 1$ [10]; HCV,  $n = 4$ [10–13]; amygdala,  $n = 1$ [11]; Insula,  $n = 2$ [11]). None of the association was significant in young adults.

#### 3.2. Brain volumes in middle age

Twelve studies reported association between BP and brain volumes in middle-aged adults (50-60 years) [13,15–25]. Higher BP was (SBP,  $n = 17\%$ ; DBP,  $n = 9\%$ ; MAP,  $n = 7\%$ ; PP,  $n = 6\%$ ) was associated with larger WMLS ( $n = 6$ ) [13,15,17–19], and smaller brain volumes including (TBV,  $n = 6$  [13,17,18,20,21,26]; GMV,  $n = 1$ [26]; WMV,  $n = 1$ [26]; HCVs,  $n = 2$ ) [13,17].

#### 3.3. BP associations in older age

Fifteen studies reported association between BP and brain volumes in older adults ( $\geq 70$  years). [2,4,5,13,16,17,27–35]. Higher BP was associated with larger WMLSCV ( $n= 8$ ) [5,17,27,28,32–35]. Lower BP (DBP,  $n = 3$ ; SBP,  $n = 1$ ) was associated with smaller TBV ( $n = 1$ ) [30] HCV ( $n = 2$ ) [2,29] Higher SBP was associated with larger HCV [16]. However, higher BP was associated with smaller TBV ( $n = 2$  [13,30]; HCV,  $n = 6$ [13,30,31]).

**Table S1.** Adjusted Newcastle-Ottawa Quality Assessment Scale for Studies.

| Criteria  | Rating | Stars |
|-----------|--------|-------|
| Selection |        | 1 ☆   |

|                                                         |                                                                                                |            |
|---------------------------------------------------------|------------------------------------------------------------------------------------------------|------------|
| 1. Representative of the general population             | i. Generally representative                                                                    | ☆          |
|                                                         | ii. Somewhat representative                                                                    | ½☆         |
|                                                         | iii. Selected group                                                                            | 0          |
|                                                         | iv. No description of the derivation of the cohort                                             | 0          |
| <b>Exposure (BP)</b>                                    |                                                                                                | <b>7 ☆</b> |
| 1. location of BP Measurement is reported               | i. Location e.g. upper arm, ankle, or central                                                  | ☆          |
|                                                         | ii. Not stated                                                                                 | 0          |
| 2. Position when BP Measurement parameters are reported | i. Position/posture e.g. standing, sitting, or supine                                          | ☆          |
|                                                         | ii. Not stated                                                                                 | 0          |
| 3. Resting period before BP measurement is reported     | i. Resting period ≥ 3 min                                                                      | ☆          |
|                                                         | ii. Resting period < 3 min                                                                     | 0          |
|                                                         | iii. No resting period before BP measurement                                                   | 0          |
|                                                         | iv. Not stated                                                                                 | 0          |
| 4. Number of BP readings is reported                    | i. Number of BP readings ≥ 2                                                                   | ☆          |
|                                                         | ii. Number of BP readings < 2                                                                  | 0          |
|                                                         | iii. No description                                                                            | 0          |
| 5. Time intervals between BP readings is reported       | i. Time intervals between readings ≥ 1 min                                                     | ☆          |
|                                                         | ii. Time intervals between readings < 1 min                                                    | 0          |
|                                                         | iii. No description                                                                            | 0          |
| 6. Hypertension was defined by two criteria             | i. BP level                                                                                    | ½☆         |
|                                                         | ii. Anti-hypertensive medication                                                               | ½☆         |
|                                                         | iii. No stated                                                                                 | 0          |
| 7. Number of BP assessment sessions                     | i. Average of BP sampling over a day or longer e.g. ambulatory BP                              | ☆          |
|                                                         | ii. Average of multiple BP measurements taken over a day or longer e.g., BP variability        | ☆          |
|                                                         | iii. Repeated occasional BP measures over time                                                 | ½☆         |
|                                                         | iv. Occasional BP                                                                              | 0          |
|                                                         | v. No stated                                                                                   | 0          |
| <b>Comparability (confounder)</b>                       |                                                                                                | <b>1½☆</b> |
| 1. Confounders controlled in analyses                   | i. Analyses control for age and sex                                                            | ☆          |
|                                                         | ii. Analyses control for additional confounders                                                | ½☆         |
|                                                         | iii. Not stated                                                                                | 0          |
| <b>Outcome</b>                                          |                                                                                                | <b>1☆</b>  |
| 1. Measurement of brain volume/segmentation             | i. Measurement conducted without knowledge of the exposure (e.g. fully automated segmentation) | ☆          |
|                                                         | ii. Measurement conducted without knowledge of the exposure (e.g. semiautomated segmentation)  | ☆          |
|                                                         | iii. Measurement done with knowledge of the exposure (Manual)                                  | 0          |
|                                                         | iv. No description                                                                             | 0          |

**Table S2.** Characteristics of the selected studies.

| Study                     | Study Design                     | N   | Age M (SD)  | Sex (% female) | BP Methods  | SBP M (SD)   | DBP M (SD)  | %HT  | %AHT | Brain Region        | Magnet / Segmentation | Covariables                                                                                         |
|---------------------------|----------------------------------|-----|-------------|----------------|-------------|--------------|-------------|------|------|---------------------|-----------------------|-----------------------------------------------------------------------------------------------------|
| Alkan et al 2019[36]      | Cross-sectional                  | 164 | 60.1 (7.8)  | 59.1           | Occasional  | 129.6 (16.9) | 79.5 (19.2) | 54.5 | NR   | WMLS                | 1.5 T/ Semi-automated | Age, education, BMI, WC, cholesterol, FBG, triglyceride, HDL-C, LDL-C, SBP, DBP, and number of MetS |
| Allan et al 2015[17]      | Cross-sectional and Longitudinal | 190 | 69.3 (5.4)  | 18.4           | Occasional  | 152.6 (1.3)  | 82.4 (1.1)  | 52.2 | NR   | WMLS, TBV, HCV      | 3 T/ Semi-automated   | Age and sex                                                                                         |
| Bender et al 2012[25]     | Cross-sectional                  | 22  | 49.0 (17.3) | 0              | Occasional  | 122.3 (10.2) | 75.6 (8.6)  | 0    | 0    | HCV, IP FC, pFWM    | 4 T/ Manual           | NR                                                                                                  |
|                           |                                  | 50  | 50.4 (12.9) | 100            |             | 119.6 (12.8) | 73.1 (6.5)  |      |      |                     |                       |                                                                                                     |
| Brickman et al 2010[27]   | Longitudinal                     | 176 | 79.3 (5.4)  | 73.3           | Variability | 130.3 (11.0) | 68.2 (5.9)  | 0    | 68.4 | WMLS                | 1.5 T/ Manual         | Age, sex, treatment status                                                                          |
|                           |                                  | 166 | 80.8 (5.6)  | 69.3           |             | 131.3 (10.2) | 68.6 (5.5)  | 100  | 65.5 |                     |                       |                                                                                                     |
|                           |                                  | 167 | 80 (5.3)    | 61.7           |             | 151.8 (12.8) | 79.8 (5.6)  | 100  | 73.2 |                     |                       |                                                                                                     |
|                           |                                  | 177 | 80 (5.6)    | 65.5           |             | 155.9 (14.7) | 80.9 (6.6)  | 100  | 73.2 |                     |                       |                                                                                                     |
| Burns et al 2005[27]      | Cross-sectional                  | 88  | 76.9 (8.2)  | 70.5           | Occasional  | 135.8 (19.2) | 72.2 (10.3) | 39.8 | NR   | WMLS                | 1.5 T/ Semi-automated | Age, sex, education, and brain atrophy                                                              |
| Cherbuin et al 2015[37]   | Cross-sectional                  | 144 | 70.4 (1.4)  | 0              | Occasional  | 150.3 (19.9) | 82.4 (10)   | NR   | 51.4 | WM/GM regions       | Semi-automated (VBM)  | Age, sex, BMI, depression, and alcohol consumption.                                                 |
|                           |                                  | 122 | 70.4 (1.4)  | 100            |             | 148.9 (18.9) | 79.5 (9.9)  |      |      |                     |                       |                                                                                                     |
| DeCarli et al 1995[38]    | Cross-sectional                  | 51  | 52 (20)     | 49.0           | Occasional  | 124 (14)     | 78 (9)      | 0    | NR   | WMLS                | 0.5 T/NR              | Age and education                                                                                   |
| De Jong et al 2014[39]    | Cross-sectional and Longitudinal | 368 | 75.5 (5.3)  | 59.0           | Occasional  | 143.1 (19.2) | 74.5 (9.8)  | 54.0 | 59.0 | MTL, BG             | 1.5 T/ Semi-automated | Age, sex, and ICV                                                                                   |
| Den Heijer et al 2005[2]  | Cross-sectional and Longitudinal | 511 | 73.4 (8)    | 49.1           | Occasional  | 145.8 (20.3) | 76.5 (11.6) | NR   | 38.9 | HCV, Amygdala       | 1.5 T/ Manual         | Age, sex and CVD factors                                                                            |
| Den Heijer et al 2012[29] | Longitudinal                     | 518 | 73.5 (7.9)  | 0              | Occasional  | 145.9 (20.6) | 76.7 (11.5) | 53.0 | 39.0 | liffe and right HCV | 1.5 T/ Semi-automated | Age, sex                                                                                            |
| Dickie et al 2016[40]     | Cross-sectional                  | 681 | 72.7 (0.7)  | 47.0           | Occasional  | 146 (18)     | 79 (9)      | 48.2 | NR   | WMLS                | 1.5 T/ Semi-automated | Sex, BMI, and CVD history                                                                           |

| Study                      | Study Design    | N    | Age M (SD)  | Sex (% female) | BP Methods  | SBP M (SD)   | DBP M (SD)  | %HT  | %AHT | Brain Region                 | Magnet / Segmentation                    | Covariables                                             |
|----------------------------|-----------------|------|-------------|----------------|-------------|--------------|-------------|------|------|------------------------------|------------------------------------------|---------------------------------------------------------|
| Firbank et al 2007[5]      | Cross-sectional | 41   | 76 (4)      | 31.7           | Occasional  | 133 (12)     | 73 (8)      | 0    | 0    | WMLS, TBV                    | 1.5 T/ Semi-automated                    | NR                                                      |
| Gattringer et al 2012[3]   | Cross-sectional | 287  | 66.6 (6.6)  | 49.8           | Occasional  | 141.6 (21.8) | 85.3 (9.7)  | 52.3 | NR   | WMLS, TBV, HCV               | 1.5 T/ Semi-automated                    | Age                                                     |
| Gianaros et al 2006[41]    | Longitudinal    | 76   | 61.3 (5)    | 0              | Occasional  | 132.4 (15.3) | 79.3 (8.7)  | 38.0 | NR   | Regional GMV                 | 1.5 T/ Semi-automated                    | Age and TBV                                             |
|                            |                 | 58   | 59.9 (5.1)  | 100            |             | 128.8 (15)   | 76.6 (9.3)  | 22.0 |      |                              |                                          |                                                         |
| Glodzik et al 2014[24]     | Cross-sectional | 77   | 63.4 (9.4)  | 46.0           | Occasional  | NR           | NR          | 39.0 | 0    | HCV                          | 1.5 T/ Semi-automated                    | Age, sex, education, ApoE status, and time to follow-up |
| Goldstein et al 2002[42]   | Longitudinal    | 155  | 66.2 (6)    | 53.9           | ABP         | NR           | NR          | 0    | 0    | TBV, lateral Ventricles      | 1.5 T Manual/ TR blinded to information  |                                                         |
| Goldstein et al 2005[18]   | Longitudinal    | 121  | 66.2 (6)    | 57.0           | Occasional  | 119.3 (13.8) | 72.2 (8.9)  | 5.8  | NR   | TBV, WMLS, Insular subcortex | 1.5 T Manual/ TR blinded to information  | Age                                                     |
| Habes et al 2016[43]       | Cross-sectional | 2367 | 52.4 (13.7) | 56.7           | Occasional  | 127.3 (17.6) | NR          | NR   | 32.7 | WMLS                         | NR/ Semi-automated                       | Age, sex and education                                  |
| Hajjar et al 2010[9]       | Cross-sectional | 43   | 68 (1)      | 56.0           | Occasional  | 129 (2)      | 66 (1)      | 51.0 | 93.0 | GMV/W M                      | 3 T/ Semi-automated                      | Age, sex, race, BMI, and AHT medication                 |
| Haring et al 2019[23]      | Longitudinal    | 558  | 78.3 (3.6)  | 100            | Variability | 122 (1)      | 73 (7)      | 48.0 | NR   | Regional GMV                 | 3 T/ Semi-automated                      | Age, education, APOE4 allele                            |
| Hoogendam et al 2012[20]   | Longitudinal    | 3962 | 60.1 (8.5)  | 54.4           | Occasional  | 135.3 (19.5) | 81.8 (10.7) | 53.9 | 0    | Cerebellar, Cerebral volume  | 1.5 T/ Semi-automated                    | Age, sex, and ICV                                       |
| Ikram et al 2008[6]        | Cross-sectional | 490  | 73.4 (7.9)  | 50.8           | Occasional  | NR           | NR          | 51.0 | 0    | TBV, GMV, WMV                | 1.5 T/ Manual/ TR blinded to information | Age and sex.                                            |
| Jeerakathil et al 2004[44] | Longitudinal    | 1814 | 53 (9.5)    | 53.0           | Occasional  | 124.5 (18.2) | NR          | 18.3 | 0    | WMLS                         | 1 T/ Manual                              | Age and sex                                             |
| Kern et al 2017[45]        | Cross-sectional | 64   | 72 (7)      | 67.2           | Occasional  | NR           | NR          | 32.8 | 34.4 | Regional GMV                 | 1.5 T/ Semi-automated                    | Age, sex, education and general intellectual ability    |

| Study                        | Study Design                     | N    | Age M (SD)  | Sex (% female) | BP Methods | SBP M (SD)   | DBP M (SD)  | %HT  | %AHT | Brain Region        | Magnet / Segmentation     | Covariables                                                                      |
|------------------------------|----------------------------------|------|-------------|----------------|------------|--------------|-------------|------|------|---------------------|---------------------------|----------------------------------------------------------------------------------|
| Kobuch et al 2020[46]        | Cross-sectional                  | 54   | 78.8 (1.5)  | 31.5           | Occasional | NR           | NR          | NR   | NR   | Regional GMV        | 3 T/ Semi-automated (VBM) | Age, sex and ICV                                                                 |
| Korf et al 2004[31]          | Longitudinal                     | 543  | 81.6 (5.0)  | 0              | Occasional | NR           | NR          | 25.8 | NR   | HCV                 | 1.5 T/ Manual             | Age, education, ApoE, smoking, alcohol, and dementia.                            |
| Lane et al 2019[13]          | Cross-sectional and Longitudinal | 441  | 69.0        | 49.0           | Occasional | 120.2 (13.7) | 78.4 (9.5)  | 16.0 | 2.0  | WMLS, TBV, HCV      | 3 T/ Semi-automated       | Sex, APOE ε4 status, AHT medication, and BP at 69 years of age.                  |
|                              |                                  |      | 60-64       | 49.0           |            | 134.9 (16.9) | 77 (9.4)    | 52.0 | 28.0 |                     |                           |                                                                                  |
|                              |                                  |      | 53.0        | 49.0           |            | 133.5 (19)   | 83.1 (11.8) | 46.0 | 12.0 |                     |                           |                                                                                  |
|                              |                                  |      | 43.0        | 49.0           |            | 123.5 (13.7) | 80.4 (9.3)  | 22.0 | 2.0  |                     |                           |                                                                                  |
|                              |                                  |      | 36.0        | 49.0           |            | 120.2 (13.7) | 78.4 (9.5)  | 16.0 | 2.0  |                     |                           |                                                                                  |
| Launer et al 2015            | Cross-sectional                  | 680  | 50.3 (3.5)  | 52.2           | Occasional | 139.9 (1.5)  | 79.5 (0.9)  | 32.2 | NR   | WMLS, TBV           | 3 T/ Semi-automated       | Age, sex, and race.                                                              |
| Mahinradet et al 2019[47]    | Longitudinal                     | 144  | 56 (4)      | 42.0           | Occasional | 107 (10)     | 65 (10)     | 48.6 | 30   | WMLS                | 3 T/ Semi-automated       | Age, sex, race, height, CVD factors, depression, and physical activity           |
| McNeil et al 2018[16]        | Cross-sectional                  | 227  | 64.5 (0.8)  | 52.0           | Occasional | 139.9 (1.5)  | 79.5 (0.9)  | NR   | 45.0 | HCV                 | 1.5 T/ Semi-automated     | Age within this narrow age range sample.                                         |
| Muller et al 2014[30]        | Longitudinal                     | 4057 | 50 (6)      | 59.0           | Occasional | 142 (13)     | 74 (6)      | 34.0 | 6.0  | WMLS, TBV, GMV, WMV | 1.5 T/ Semi-automated     | Age, sex, education and CVD factors                                              |
| Muller et al 2016[48]        | Longitudinal                     | 1348 | 50 (6)      | 58.0           | Occasional | NR           | NR          | 35.0 | 0    | WMLS, TBV, GMV, WMV | 1.5 T/ Semi-automated     | Age, sex, education, and late-life CVD.                                          |
| Nation et al 2016[21]        | Longitudinal                     | 549  | 59.6 (2.7)  | 53.2           | Occasional | 124 (16)     | 75 (9)      | 37.9 | 0    | WMLS, TBV, HCV      | 1.5 T/ Semi-automated     | Age, sex, and education                                                          |
| Paganini-Hill et al 2019[28] | Longitudinal                     | 97   | 92.4 (0.3)  | 60             | ABP        | 142 (1.5)    | 71 (1)      | 65.0 | NA   | WMLS                | 3 T/ Semi-automated       | Age, sex, education, smoking and histories of CVD and cerebral vascular diseases |
| Pase et al 2016[22]          | Cross-sectional                  | 332  | 62.9 (10.2) | 54.0           | IDSBP      | 134 (19)     | 76 (10)     | 38.7 | 35.0 | WMLS, TBV           | 1 T or 1.5 T/NR           | Age, sex, and age                                                                |

| Study                    | Study Design                     | N    | Age M (SD)  | Sex (% female) | BP Methods  | SBP M (SD)   | DBP M (SD)  | %HT  | %AHT | Brain Region          | Magnet / Segmentation | Covariables                                                                                                                           |
|--------------------------|----------------------------------|------|-------------|----------------|-------------|--------------|-------------|------|------|-----------------------|-----------------------|---------------------------------------------------------------------------------------------------------------------------------------|
| Power et al 2016[49]     | Cross-sectional and Longitudinal | 1678 | 52.0        | 61.0           | Occasional  | 130 (5.9)    | 66 (3.6)    | 23.0 | 72.0 | TBV, HCV, brain lobes | 3 T/ Semi-automated   | Age, sex, race, education, ICV, BMI, DM, cholesterol, and smoking status                                                              |
| Sabayan et al 2013[4]    | Longitudinal                     | 553  | 74.9 (3.2)  | 43.6           | Variability | 156.1 (16.4) | 85.1 (7.3)  | 63.1 | NR   | GMV, WM, HCV          | 1.5 T/ Semi-automated | Average BP and CVD factors                                                                                                            |
| Schaare et al 2019[50]   | Cross-sectional                  | 423  | 27.7 (5.3)  | 41.8           | Occasional  | 123.2 (12.2) | 73.4 (8.5)  | 11.0 | 0    | Regional GMV          | 3 T/ Semi-automated   | Age, sex, and ICV                                                                                                                     |
| Scott et al 2015[32]     | Cross-sectional                  | 150  | 73.7 (6.3)  | 48.7           | Occasional  | 136 (16)     | 75 (10)     | 44.0 | NR   | WMLS                  | 3 T/NR                |                                                                                                                                       |
| Spartano et al 2016[51]  | Longitudinal                     | 1094 | 40 (9)      | 53.9           | Exercise    | 166 (25.0)   | 74 (9)      | 28.3 | 17.7 | TBV                   | 1.5 T/NR              | Age, sex, time between examination cycle and MRI, smoking, DM, APOE e4 genotype status, use of AHT medication; and serum homocysteine |
| Suzuki et al 2017[26]    | Cross-sectional                  | 1559 | 62.6 (7)    | 52.0           | Occasional  | 125.6 (9.5)  | 74.5 (7.1)  | 0    | 0    | TBV, GMV, WMV         | 3 T/ Semi-automated   | Age, sex, education, BMI, and history of smoking, DM and CVD.                                                                         |
|                          |                                  | 1559 | 62.6 (6.8)  | 52.3           |             | 125.6 (9.5)  | 74.5 (7.1)  | 100  | 38.7 |                       |                       |                                                                                                                                       |
| Taki et al 2004[52]      | Cross-sectional                  | 769  | 47.4 (13.5) | 53.8           | Occasional  | NR           | NR          | 11.9 | 82.0 | Regional GMV          | 0.5 T/ Semi-automated |                                                                                                                                       |
| Taki et al 2013[53]      | Longitudinal                     | 381  | 51.2 (11.8) | 59.0           | Occasional  | NR           | NR          | NR   | NR   | Regional GMV          | 0.5 T/ Semi-automated | Sex, ICV, SBP, and BMI                                                                                                                |
| Trotman et al 2019[11]   | Cross-sectional                  | 40   | 19.1 (0.2)  | 100            | Reactivity  | 122 (11.7)   | 77 (8.6)    | NR   | NR   | HCV, Amygdala, Insula | 3 T/ Semi-automated   | Age, ICV, SES, and BMI                                                                                                                |
| vanVelsen et al 2013[7]  | Cross-sectional                  | 1022 | 68.4 (7.3)  | 52.3           | Occasional  | 144.5 (18.6) | 80.3 (10.3) | 47.4 | 0    | Cortical thickness    | 1.5 T/ Semi-automated | Age and sex.                                                                                                                          |
| Verhaaren et al 2013[54] | Cross-sectional                  | 665  | 61.6 (5)    | 52.0           | Occasional  | 138 (19)     | 78 (10)     | 25.9 | 22.0 | WMLS                  | 1.5 T/ Semi-automated | Age, sex, and ICV, CVD factors                                                                                                        |

| Study                  | Study Design                     | N   | Age M (SD) | Sex (% female) | BP Methods  | SBP M (SD)   | DBP M (SD) | %HT  | %AHT | Brain Region       | Magnet / Segmentation | Covariables                                                                                                     |
|------------------------|----------------------------------|-----|------------|----------------|-------------|--------------|------------|------|------|--------------------|-----------------------|-----------------------------------------------------------------------------------------------------------------|
| Wardlaw et al 2014[35] | Cross-sectional                  | 881 | 72.5 (0.7) | 52.0           | Occasional  | 120.2 (13.7) | 78.4 (9.5) | 49.0 | NR   | WMLS               | 1.5 T/ Semi-automated | Sex                                                                                                             |
| White et al 2011[34]   | Longitudinal                     | 72  | 82.1 (3.9) | 56.9           | Occasional  | 122 (1.3)    | 73 (7)     | 70   | 64.0 | WMLS               | 3 T/ Semi-automated   | Age and LDL cholesterol levels,                                                                                 |
| Wiseman et al 2004[8]  | Cross-sectional                  | 154 | 77.2 (3.7) | 78.6           | Occasional  | 150 (16)     | 80 (9)     | 66.9 | 16.2 | TBV, HCV           | 1.5 T/ Semi-automated | Age and ICV                                                                                                     |
| Wolfson et al 2013[33] | Cross-sectional and Longitudinal | 67  | 81.7 (3.9) | 61.0           | ASBP        | 138 (14)     | 69 (7)     | NR   | 69.0 | WMLS               | 3 T/ Semi-automated   | Age, sex, and BMI or education                                                                                  |
| Yano et al 2017[10]    | Longitudinal                     | 547 | 25.6 (3.4) | 53.9           | Variability | 123.2 (12.2) | 73.4 (8.5) | 51.8 | 21.2 | TBV, GMV, WMV, HCV | 3 T/ Semi-automated   | Age, sex, ICV, antihypertensive medications, education, fasting glucose, smoking, and physical activity and BMI |

M = mean; SD = standard deviation; SBP = Systolic Blood Pressure; DBP = Diastolic Blood Pressure; ASBP= ambulatory systolic blood pressure; ABP = ambulatory blood pressure; WMLS = White matter lesions; TBV = total brain volume; GMV= grey matter volume; WMV = white matter volume; HCV = Hippocampal volume; ICV = Intercranial volume; IPFC= ateral prefrontal cortex, pFWM = prefrontal white matter. CVD= Cardiovascular disease; Hypertension = HT; ATH = Antihypertensive; BMI = body mass index; DM = DM mellitus; WC = waist circumference, FBG = fasting blood glucose; APOE e4= Apolipoprotein E ; HDL-C= High-density lipoprotein cholesterol; LDL-C= low density lipoprotein-cholesterol, MetS= Metabolic syndrome; SES= socioeconomic status; T = tesla.

**Table S3.** Methodological quality of studies.

| Studies                   | Total Rating | Methodological quality |
|---------------------------|--------------|------------------------|
| Alkan et al 2019[36]      | 9.0/10.5     | (85.7%) High           |
| Allan et al 2015[17]      | 6.5/10.5     | (61.9%) Moderate       |
| Bender et al 2012[25]     | 6.5/10.5     | (61.9%) Moderate       |
| Brickman et al 2010[27]   | 7.5/10.5     | (71.4%) High           |
| Burns et al 2005[27]      | 2.0/10.5     | (19%) Low              |
| Cherbuin et al 2015[37]   | 8.0/10.5     | (76.2%) High           |
| DeCarli et al 1995[38]    | 0.5 /10.5    | (76.2%) Low            |
| De Jong et al 2014[39]    | 3.5 /10.5    | (33.3%) Low            |
| Den Heijeret al 2005[2]   | 2.5 /10.5    | (23.8%) Low            |
| Den Heijer et al 2012[29] | 6.5 /10.5    | (61.9%) Moderate       |
| Dickie et al 2016[40]     | 5.0 /10.5    | (47.6%) Moderate       |
| Firbank et al 2007[5]     | 8.0 /10.5    | (76.2%) High           |
| Gattringer et al 2012[3]  | 1.5 /10.5    | (14.3%) Low            |
| Gianaros et al 2006[41]   | 8.0 /10.5    | (76.2%) High           |
| Glodzik et al 2014[24]    | 5.5 /10.5    | (52.4%) Moderate       |
| Goldstein et al 2002[42]  | 7.0 /10.5    | (66.7%) Moderate       |
| Goldstein et al 2005[18]  | 6.0 /10.5    | (57.1%) Moderate       |
| Habes et al 2016[43]      | 8.0 /10.5    | (76.2%) High           |

|                              |            |                    |
|------------------------------|------------|--------------------|
| Hajjar et al 2010[9]         | 8. /10.5   | 5 (81%) High       |
| Haring et al 2019[23]        | 9.0 /10.5  | 9 (85.7%) High     |
| Hoogendam et al 2012[20]     | 7.0 /10.5  | 7 (66.7%) Moderate |
| Ikram et al 2008[6]          | 5.5 /10.5  | 6 (52.4%) Moderate |
| Jeerakathil et al 2004[44]   | 3.0 /10.5  | 3 (28.6%) Low      |
| Kern et al 2017[45]          | 9.0 /10.5  | 9 (85.7%) High     |
| Kobuch et al 2020[46]        | 5.5 /10.5  | 6 (52.4%) Moderate |
| Korf et al 2004[31]          | 3.0 /10.5  | 3 (28.6%) Low      |
| Lane et al 2019[13]          | 9.0 /10.5  | 9 (85.7%) High     |
| Launer et al 2015[14]        | 6.5 /10.5  | 7 (61.9%) Moderate |
| Mahinradet al 2019[47]       | 10.0 /10.5 | 10 (95.2%) High    |
| McNeil et al 2018[16]        | 6.5 /10.5  | 7 (61.9%) Moderate |
| Muller et al 2014[30]        | 6.0 /10.5  | 7 (57.1%) Moderate |
| Muller et al 2016[48]        | 5.0 /10.5  | 6 (47.6%) Moderate |
| Nation et al 2016[21]        | 8.0 /10.5  | 8 (76.2%) High     |
| Paganini-Hill et al 2019[28] | 4.0 /10.5  | 4 (38.1%) Low      |
| Pase et al 2016[22]          | 8.0 /10.5  | 8 (76.2%) High     |
| Power et al 2016[49]         | 5.0 /10.5  | 6 (47.6%) Moderate |
| Sabayan et al 2013[4]        | 5.0 /10.5  | 6 (47.6%) Moderate |
| Schaare et al 2019[50]       | 10.0 /10.5 | 10 (95.2%) High    |
| Scott et al 2015[32]         | 2.0/10.5   | 2 (19%) Low        |
| Spartano et al 2016[51]      | 4.0 /10.5  | 4 (38.1%) Low      |
| Suzuki et al 2017[26]        | 9.0 /10.5  | 9 (85.7%) High     |
| Taki et al 2004[52]          | 4.5 /10.5  | 5 (42.9%) Moderate |
| Taki et al 2013[53]          | 5.5 /10.5  | 6 (52.4%) Moderate |
| Trotman et al 2019[11]       | 2.5 /10.5  | 3 (23.8%) Low      |
| Tsao et al 2016[19]          | 6.0 /10.5  | 7 (57.1%) Moderate |
| vanVelsen et al 2013[7]      | 5.0 /10.5  | 6 (47.6%) Moderate |
| Verhaaren et al 2013[54]     | 8.5 /10.5  | 9 (81.0%) High     |
| Wardlaw et al 2014[35]       | 5.0 /10.5  | 6 (47.6%) Moderate |
| White et al 2011[34]         | 6.5 /10.5  | 7 (61.9%) Moderate |
| Wiseman et al 2004[8]        | 4.5 /10.5  | 5 (42.9%) Moderate |
| Wolfson et al 2013[33]       | 9.0 /10.5  | 9 (85.7%) High     |
| Yano et al 2017[10]          | 9.5 /10.5  | 10 (90.5%) High    |

### Meta-analysis results

#### White matter lesions volume (WMLS)

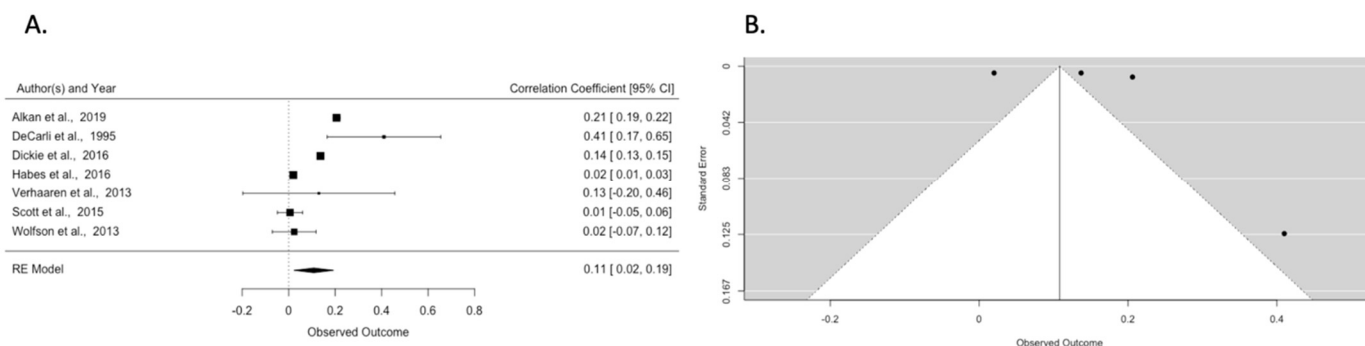

**Figure S1.** Association between SBP and White matter lesions from cross-sectional studies A. Forest plots; B. Sensitivity Analysis; trim and fill.

#### Random-Effects Model (k = 7; tau<sup>2</sup> estimator: REML)

| logLik | deviance | AIC     | BIC     | AICc   |
|--------|----------|---------|---------|--------|
| 3.6850 | -7.3700  | -3.3700 | -3.7865 | 0.6300 |



tau^2 (estimated amount of total heterogeneity): 0.0102 (SE = 0.0073)  
 tau (square root of estimated tau^2 value): 0.1010  
 I^2 (total heterogeneity / total variability): 99.06%  
 H^2 (total variability / sampling variability): 106.59

*Test for Heterogeneity:*

Q(df = 6) = 506.2446, p-val < .0001

*Model Results:*

| estimate | se     | zval   | pval   | ci.lb  | ci.ub    |
|----------|--------|--------|--------|--------|----------|
| 0.1081   | 0.0435 | 2.4882 | 0.0128 | 0.0230 | 0.1933 * |

Signif. codes: 0 '\*\*\*' 0.001 '\*\*' 0.01 '\*' 0.05 '.' 0.1 ' ' 1

**Sensitivity Analysis**

Estimated number of missing studies on the left side: 0 (SE = 1.8715)  
 Random-Effects Model (k = 7; tau^2 estimator: REML)  
 tau^2 (estimated amount of total heterogeneity): 0.0102 (SE = 0.0073)  
 tau (square root of estimated tau^2 value): 0.1010  
 I^2 (total heterogeneity / total variability): 99.06%  
 H^2 (total variability / sampling variability): 106.59

*Test for Heterogeneity:*

Q(df = 6) = 506.2446, p-val < .0001

*Model Results:*

| estimate | se     | zval   | pval   | ci.lb  | ci.ub    |
|----------|--------|--------|--------|--------|----------|
| 0.1081   | 0.0435 | 2.4882 | 0.0128 | 0.0230 | 0.1933 * |

Signif. codes: 0 '\*\*\*' 0.001 '\*\*' 0.01 '\*' 0.05 '.' 0.1 ' ' 1

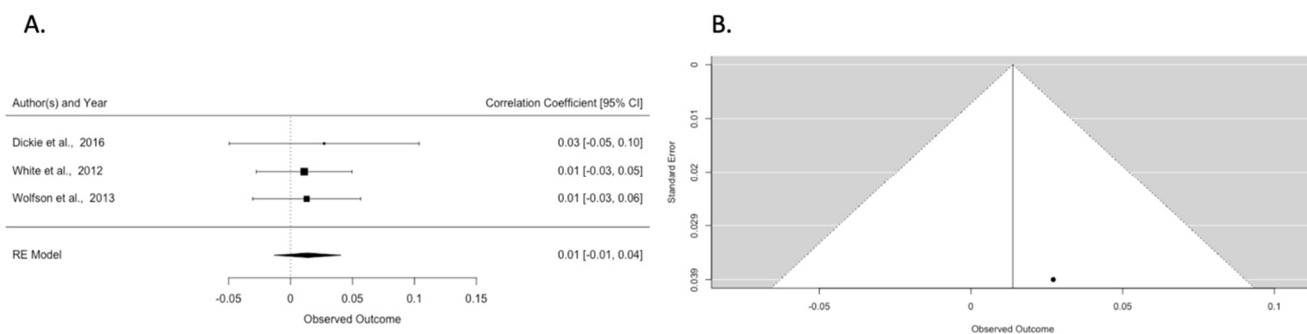

**Figure S2.** Association between SBP and White matter lesions from longitudinal studies. A. Forest plots; B. Sensitivity Analysis and fill.

**Random-Effects Model (k = 3; tau^2 estimator: REML)**

| logLik | deviance | AIC     | BIC     | AICc   |
|--------|----------|---------|---------|--------|
| 5.3344 | -10.6687 | -6.6687 | -9.2824 | 5.3313 |

tau^2 (estimated amount of total heterogeneity): 0 (SE = 0.0006)

tau (square root of estimated tau<sup>2</sup> value): 0  
 I<sup>2</sup> (total heterogeneity / total variability): 0.00%  
 H<sup>2</sup> (total variability / sampling variability): 1.00

*Test for Heterogeneity:*

Q(df = 2) = 0.1372, p-val = 0.9337

*Model Results:*

| estimate                                                      | se     | zval   | pval   | ci.lb   | ci.ub  |
|---------------------------------------------------------------|--------|--------|--------|---------|--------|
| 0.0138                                                        | 0.0138 | 0.9984 | 0.3181 | -0.0133 | 0.0408 |
| Signif. codes: 0 '***' 0.001 '**' 0.01 '*' 0.05 '.' 0.1 ' ' 1 |        |        |        |         |        |

**Sensitivity Analysis**

Estimated number of missing studies on the left side: 0 (SE = 1.4967)  
 Random-Effects Model (k = 3; tau<sup>2</sup> estimator: REML)  
 tau<sup>2</sup> (estimated amount of total heterogeneity): 0 (SE = 0.0006)  
 tau (square root of estimated tau<sup>2</sup> value): 0  
 I<sup>2</sup> (total heterogeneity / total variability): 0.00%  
 H<sup>2</sup> (total variability / sampling variability): 1.00

*Test for Heterogeneity:*

Q(df = 2) = 0.1372, p-val = 0.9337

*Model Results:*

| estimate                                                      | se     | zval   | pval   | ci.lb   | ci.ub  |
|---------------------------------------------------------------|--------|--------|--------|---------|--------|
| 0.0138                                                        | 0.0138 | 0.9984 | 0.3181 | -0.0133 | 0.0408 |
| Signif. codes: 0 '***' 0.001 '**' 0.01 '*' 0.05 '.' 0.1 ' ' 1 |        |        |        |         |        |

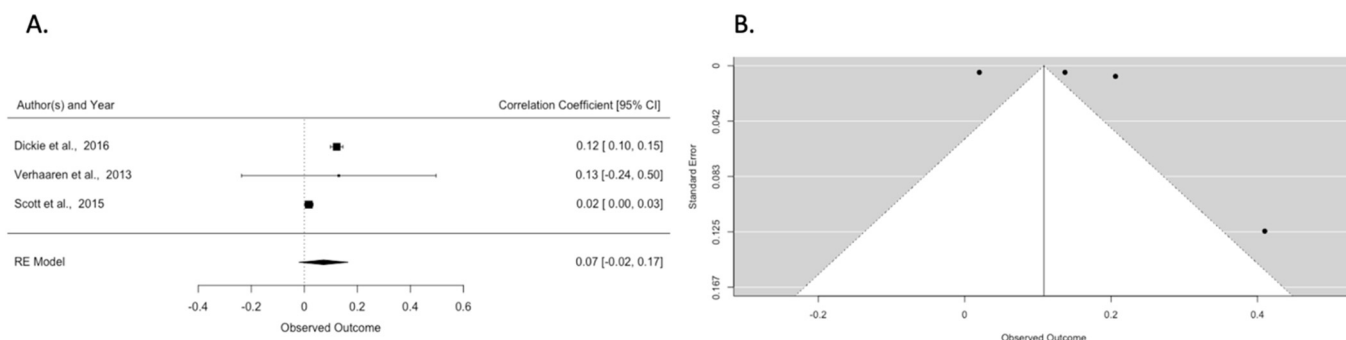

**Figure S3.** Association between DBP and White matter lesions from longitudinal studies. A. Forest plots; B. Sensitivity Analysis; trim and fill.

**Random-Effects Model (k = 3; tau<sup>2</sup> estimator: REML)**

| logLik                                                                           | deviance | AIC    | BIC     | AICc    |
|----------------------------------------------------------------------------------|----------|--------|---------|---------|
| 1.9996                                                                           | -3.9992  | 0.0008 | -2.6129 | 12.0008 |
| tau <sup>2</sup> (estimated amount of total heterogeneity): 0.0047 (SE = 0.0067) |          |        |         |         |

tau (square root of estimated tau<sup>2</sup> value): 0.0683  
 I<sup>2</sup> (total heterogeneity / total variability): 95.69%  
 H<sup>2</sup> (total variability / sampling variability): 23.21

Test for Heterogeneity:

Q(df = 2) = 52.3723, p-val < .0001

Model Results:

| estimate       | se     | zval   | pval   | ci.lb   | ci.ub  |          |         |       |
|----------------|--------|--------|--------|---------|--------|----------|---------|-------|
| 0.0725         | 0.0475 | 1.5283 | 0.1264 | -0.0205 | 0.1656 |          |         |       |
| Signif. codes: | 0      | '***'  | 0.001  | '**'    | 0.01   | '*' 0.05 | ' ' 0.1 | ' ' 1 |

**Sensitivity Analysis**

Estimated number of missing studies on the left side: 0 (SE = 1.8715)  
 Random-Effects Model (k = 7; tau<sup>2</sup> estimator: REML)  
 tau<sup>2</sup> (estimated amount of total heterogeneity): 0.0102 (SE = 0.0073)  
 tau (square root of estimated tau<sup>2</sup> value): 0.1010  
 I<sup>2</sup> (total heterogeneity / total variability): 99.06%  
 H<sup>2</sup> (total variability / sampling variability): 106.59

Test for Heterogeneity:

Q(df = 6) = 506.2446, p-val < .0001

Model Results:

| estimate       | se     | zval   | pval   | ci.lb  | ci.ub  |          |         |       |
|----------------|--------|--------|--------|--------|--------|----------|---------|-------|
| 0.1081         | 0.0435 | 2.4882 | 0.0128 | 0.0230 | 0.1933 |          |         |       |
| Signif. codes: | 0      | '***'  | 0.001  | '**'   | 0.01   | '*' 0.05 | ' ' 0.1 | ' ' 1 |

**Total brain volume (TBV)**

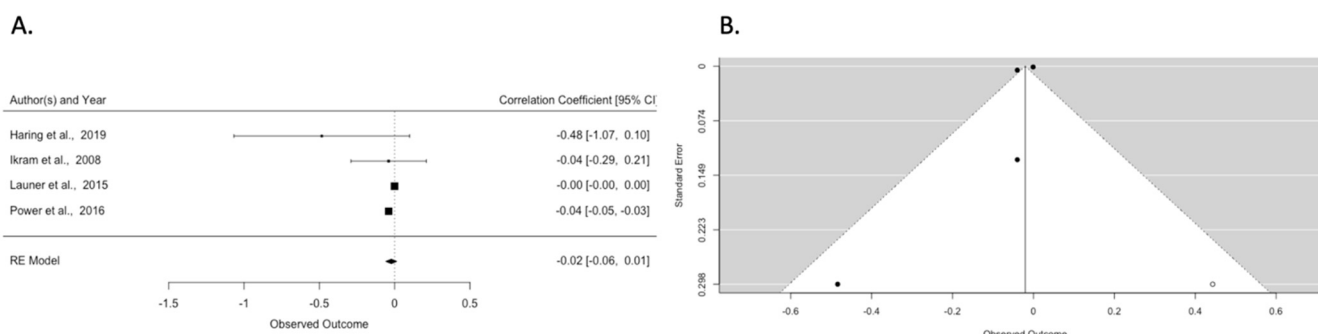

**Figure S4.** Association between SBP and total brain volume from cross-sectional studies. A. Forest plots; B. Sensitivity Analysis; trim and fill.

**Random-Effects Model (k = 4; tau<sup>2</sup> estimator: REML)**

| logLik                                                      | deviance             | AIC     | BIC     | AICc    |
|-------------------------------------------------------------|----------------------|---------|---------|---------|
| 2.6975                                                      | -5.3950              | -1.3950 | -3.1977 | 10.6050 |
| tau <sup>2</sup> (estimated amount of total heterogeneity): | 0.0007 (SE = 0.0010) |         |         |         |
| tau (square root of estimated tau <sup>2</sup> value):      | 0.0269               |         |         |         |
| I <sup>2</sup> (total heterogeneity / total variability):   | 94.33%               |         |         |         |

$H^2$  (total variability / sampling variability): 17.63

Test for Heterogeneity:

$Q(df = 3) = 55.4156, p\text{-val} < .0001$

Model Results:

| estimate                                                      | se     | zval    | pval   | ci.lb   | ci.ub  |
|---------------------------------------------------------------|--------|---------|--------|---------|--------|
| -0.0223                                                       | 0.0190 | -1.1762 | 0.2395 | -0.0596 | 0.0149 |
| Signif. codes: 0 '***' 0.001 '**' 0.01 '*' 0.05 '.' 0.1 ' ' 1 |        |         |        |         |        |

**Sensitivity Analysis**

Estimated number of missing studies on the right side: 1 (SE = 1.5779)  
 Random-Effects Model (k = 5; tau^2 estimator: REML)  
 tau^2 (estimated amount of total heterogeneity): 0.0007 (SE = 0.0010)  
 tau (square root of estimated tau^2 value): 0.0268  
 I^2 (total heterogeneity / total variability): 92.53%  
 H^2 (total variability / sampling variability): 13.38

Test for Heterogeneity:

$Q(df = 4) = 57.6540, p\text{-val} < .0001$

Model Results:

| estimate                                                      | se     | zval    | pval   | ci.lb   | ci.ub  |
|---------------------------------------------------------------|--------|---------|--------|---------|--------|
| -0.0205                                                       | 0.0189 | -1.0834 | 0.2786 | -0.0575 | 0.0166 |
| Signif. codes: 0 '***' 0.001 '**' 0.01 '*' 0.05 '.' 0.1 ' ' 1 |        |         |        |         |        |

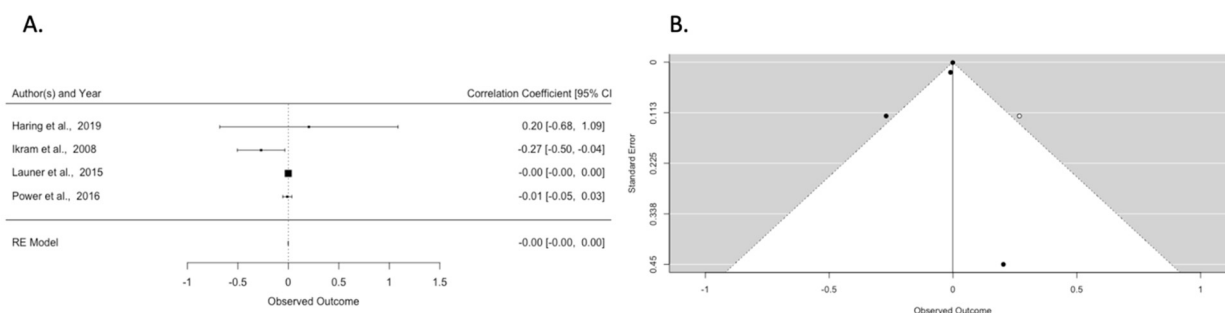

**Figure S5.** Association between DBP and total brain volume from cross-sectional studies. A. Forest plots; B. Sensitivity Analysis; trim and fill.

**Random-Effects Model (k = 4; tau^2 estimator: REML)**

| logLik                                                           | deviance | AIC    | BIC     | AICc    |
|------------------------------------------------------------------|----------|--------|---------|---------|
| 1.9396                                                           | -3.8792  | 0.1208 | -1.6820 | 12.1208 |
| tau^2 (estimated amount of total heterogeneity): 0 (SE = 0.0004) |          |        |         |         |
| tau (square root of estimated tau^2 value): 0                    |          |        |         |         |
| I^2 (total heterogeneity / total variability): 0.00%             |          |        |         |         |
| H^2 (total variability / sampling variability): 1.00             |          |        |         |         |

Test for Heterogeneity:

$Q(df = 3) = 5.3948, p\text{-val} = 0.1451$

*Model Results:*

|                                                               |        |         |        |         |        |
|---------------------------------------------------------------|--------|---------|--------|---------|--------|
| estimate                                                      | se     | zval    | pval   | ci.lb   | ci.ub  |
| -0.0010                                                       | 0.0010 | -1.0361 | 0.3002 | -0.0030 | 0.0009 |
| Signif. codes: 0 '***' 0.001 '**' 0.01 '*' 0.05 '.' 0.1 ' ' 1 |        |         |        |         |        |

**Sensitivity Analysis**

Estimated number of missing studies on the right side: 1 (SE = 1.6103)  
 Random-Effects Model (k = 5; tau^2 estimator: REML)  
 tau^2 (estimated amount of total heterogeneity): 0 (SE = 0.0004)  
 tau (square root of estimated tau^2 value): 0  
 I^2 (total heterogeneity / total variability): 0.00%  
 H^2 (total variability / sampling variability): 1.00

*Test for Heterogeneity:*

Q(df = 4) = 10.4280, p-val = 0.0338

*Model Results:*

|                                                               |        |         |        |         |        |
|---------------------------------------------------------------|--------|---------|--------|---------|--------|
| estimate                                                      | se     | zval    | pval   | ci.lb   | ci.ub  |
| -0.0010                                                       | 0.0010 | -1.0174 | 0.3090 | -0.0030 | 0.0009 |
| Signif. codes: 0 '***' 0.001 '**' 0.01 '*' 0.05 '.' 0.1 ' ' 1 |        |         |        |         |        |

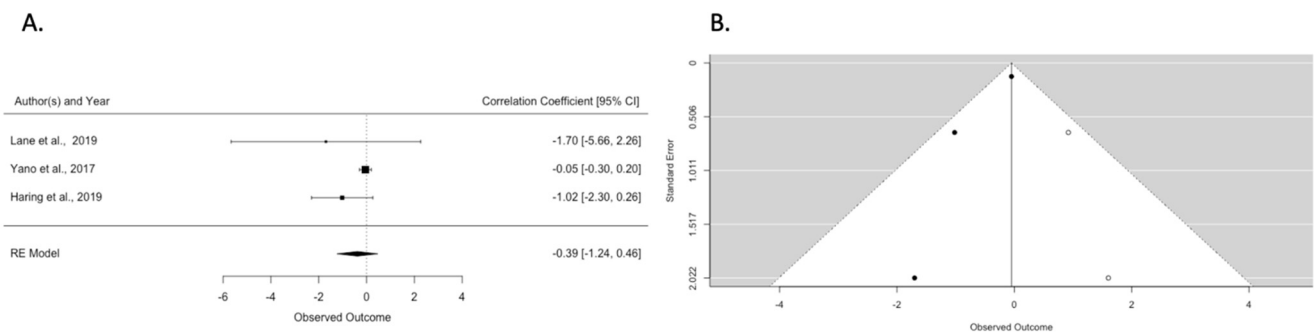

**Figure S6.** Association between SBP variability and total brain volume from longitudinal studies. A. Forest plots; B. Sensitivity Analysis; trim and fill.

**Random-Effects Model** (k = 3; tau^2 estimator: REML)

|                                                                       |          |        |        |         |
|-----------------------------------------------------------------------|----------|--------|--------|---------|
| logLik                                                                | deviance | AIC    | BIC    | AICc    |
| -2.7216                                                               | 5.4432   | 9.4432 | 6.8295 | 21.4432 |
| tau^2 (estimated amount of total heterogeneity): 0.2601 (SE = 0.6657) |          |        |        |         |
| tau (square root of estimated tau^2 value): 0.5100                    |          |        |        |         |
| I^2 (total heterogeneity / total variability): 39.31%                 |          |        |        |         |
| H^2 (total variability / sampling variability): 1.65                  |          |        |        |         |

*Test for Heterogeneity:*

Q(df = 2) = 2.7519, p-val = 0.2526

Model Results:

|                                                               |        |         |        |         |        |
|---------------------------------------------------------------|--------|---------|--------|---------|--------|
| estimate                                                      | se     | zval    | pval   | ci.lb   | ci.ub  |
| -0.3862                                                       | 0.4342 | -0.8895 | 0.3738 | -1.2371 | 0.4648 |
| Signif. codes: 0 '***' 0.001 '**' 0.01 '*' 0.05 '.' 0.1 ' ' 1 |        |         |        |         |        |

Sensitivity Analysis

Estimated number of missing studies on the right side: 2 (SE = 1.4881)  
 Random-Effects Model (k = 5; tau^2 estimator: REML)  
 tau^2 (estimated amount of total heterogeneity): 0.1990 (SE = 0.4248)  
 tau (square root of estimated tau^2 value): 0.4461  
 I^2 (total heterogeneity / total variability): 32.73%  
 H^2 (total variability / sampling variability): 1.49

Test for Heterogeneity:

Q(df = 4) = 5.7247, p-val = 0.2207

Model Results:

|                                                               |        |         |        |         |        |
|---------------------------------------------------------------|--------|---------|--------|---------|--------|
| estimate                                                      | se     | zval    | pval   | ci.lb   | ci.ub  |
| -0.0490                                                       | 0.3470 | -0.1412 | 0.8877 | -0.7290 | 0.6310 |
| Signif. codes: 0 '***' 0.001 '**' 0.01 '*' 0.05 '.' 0.1 ' ' 1 |        |         |        |         |        |

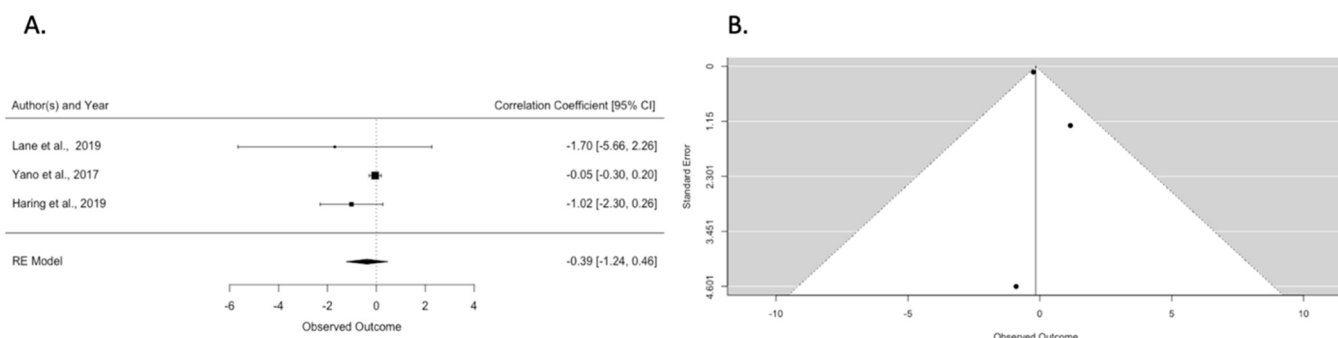

Figure S7. Association between DBP variability and total brain volume from longitudinal studies. A. Forest plots; B. Sensitivity Analysis; trim and fill.

Random-Effects Model (k = 3; tau^2 estimator: REML)

|         |          |         |        |         |
|---------|----------|---------|--------|---------|
| logLik  | deviance | AIC     | BIC    | AICc    |
| -3.6756 | 7.3513   | 11.3513 | 8.7376 | 23.3513 |

tau^2 (estimated amount of total heterogeneity): 0.1079 (SE = 1.2247)  
 tau (square root of estimated tau^2 value): 0.3285  
 I^2 (total heterogeneity / total variability): 6.96%  
 H^2 (total variability / sampling variability): 1.07

Test for Heterogeneity:

$Q(df = 2) = 1.2944, p\text{-val} = 0.5235$

*Model Results:*

|          |        |         |        |         |        |
|----------|--------|---------|--------|---------|--------|
| estimate | se     | zval    | pval   | ci.lb   | ci.ub  |
| -0.1526  | 0.3365 | -0.4536 | 0.6501 | -0.8121 | 0.5069 |

Signif. codes: 0 '\*\*\*' 0.001 '\*\*' 0.01 '\*' 0.05 '.' 0.1 ' ' 1

**Sensitivity Analysis**

Estimated number of missing studies on the left side: 0 (SE = 1.4967)  
 Random-Effects Model (k = 3; tau^2 estimator: REML)  
 tau^2 (estimated amount of total heterogeneity): 0.1079 (SE = 1.2247)  
 tau (square root of estimated tau^2 value): 0.3285  
 I^2 (total heterogeneity / total variability): 6.96%  
 H^2 (total variability / sampling variability): 1.07

*Test for Heterogeneity:*

$Q(df = 2) = 1.2944, p\text{-val} = 0.5235$

*Model Results*

|          |        |         |        |         |        |
|----------|--------|---------|--------|---------|--------|
| estimate | se     | zval    | pval   | ci.lb   | ci.ub  |
| -0.1526  | 0.3365 | -0.4536 | 0.6501 | -0.8121 | 0.5069 |

Signif. codes: 0 '\*\*\*' 0.001 '\*\*' 0.01 '\*' 0.05 '.' 0.1 ' ' 1

**Hippocampal volume (HCV)**

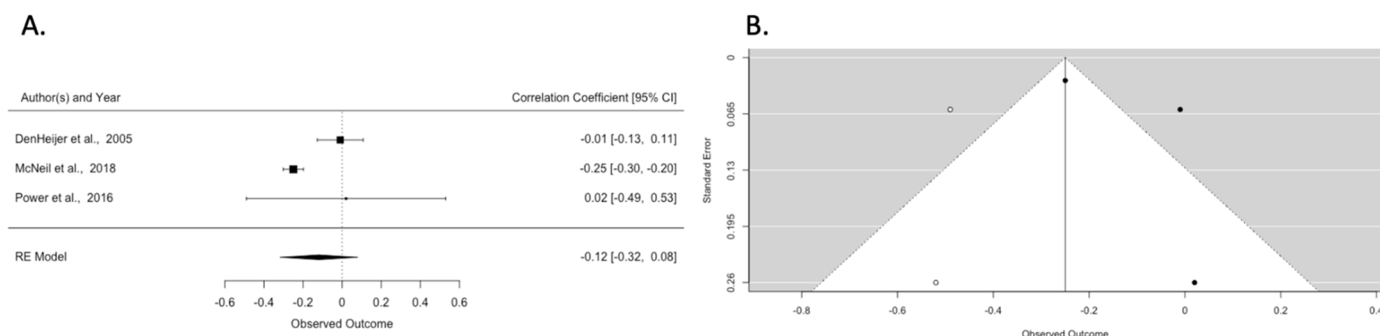

**Figure S8.** Association between DBP and hippocampal volume from cross-sectional studies. A. Forest plots; B. Sensitivity Analysis; trim and fill.

**Random-Effects Model (k = 3; tau^2 estimator: REML)**

|        |          |        |        |         |
|--------|----------|--------|--------|---------|
| logLik | deviance | AIC    | BIC    | AICc    |
| 0.6525 | -1.3049  | 2.6951 | 0.0813 | 14.6951 |

tau^2 (estimated amount of total heterogeneity): 0.0211 (SE = 0.0310)  
 tau (square root of estimated tau^2 value): 0.1453  
 I^2 (total heterogeneity / total variability): 83.80%  
 H^2 (total variability / sampling variability): 6.17

*Test for Heterogeneity:*

$Q(df = 2) = 14.1697, p\text{-val} = 0.0008$

*Model Results:*

```

estimate   se    zval   pval   ci.lb  ci.ub
-0.1193  0.1012 -1.1787  0.2385 -0.3177  0.0791
Signif. codes:  0 '***' 0.001 '**' 0.01 '*' 0.05 '.' 0.1 ' ' 1
    
```

**Sensitivity Analysis**

Estimated number of missing studies on the left side: 2 (SE = 1.4881)  
 Random-Effects Model (k = 5; tau^2 estimator: REML)  
 tau^2 (estimated amount of total heterogeneity): 0.0432 (SE = 0.0413)  
 tau (square root of estimated tau^2 value): 0.2078  
 I^2 (total heterogeneity / total variability): 90.88%  
 H^2 (total variability / sampling variability): 10.97

*Test for Heterogeneity:*

Q(df = 4) = 34.1568, p-val < .0001

*Model Results:*

```

estimate   se    zval   pval   ci.lb  ci.ub
-0.2500  0.1094 -2.2854  0.0223 -0.4644 -0.0356 *
Signif. codes:  0 '***' 0.001 '**' 0.01 '*' 0.05 '.' 0.1 ' ' 1
    
```

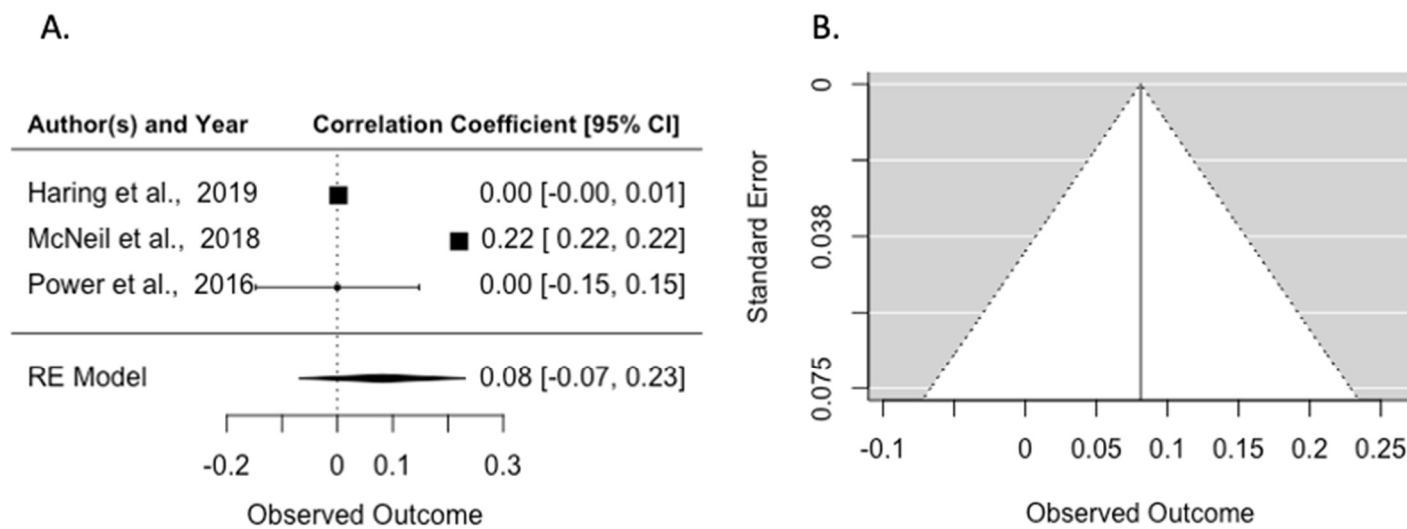

**Figure S9.** Association between DBP and hippocampal volume from cross-sectional studies. A. Forest plots; B. Sensitivity Analysis: trim and fill.

**Random-Effects Model (k = 3; tau^2 estimator: REML)**

```

logLik  deviance  AIC    BIC    AICc
1.2400  -2.4800  1.5200 -1.0937  13.5200
tau^2 (estimated amount of total heterogeneity): 0.0161 (SE = 0.0177)
tau (square root of estimated tau^2 value): 0.1270
    
```

*Model Results:*

```

estimate   se    zval   pval   ci.lb  ci.ub
0.0810  0.0767  1.0554  0.2912 -0.0694  0.2313
    
```



Signif. codes: 0 '\*\*\*' 0.001 '\*\*' 0.01 '\*' 0.05 '.' 0.1 ' ' 1

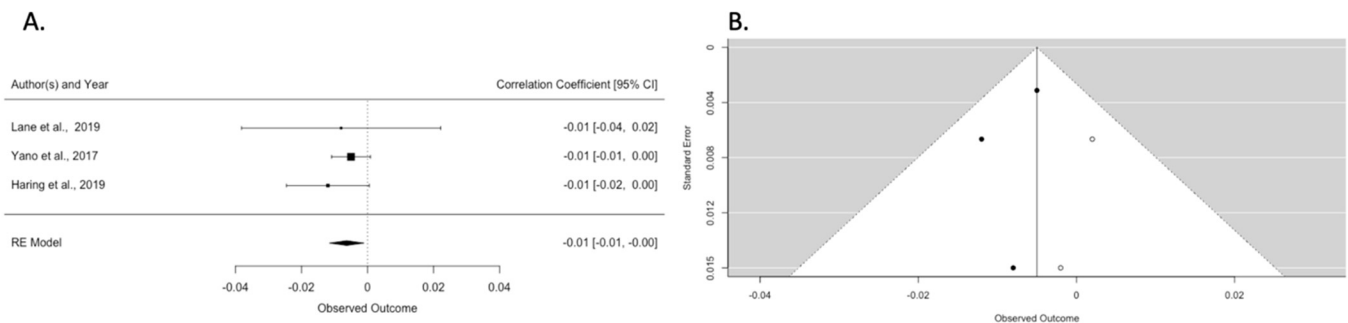

**Figure S10.** Association between SBP variability and hippocampal volume from longitudinal studies. A. Forest plots; B. Sensitivity Analysis; trim and fill.

**Random-Effects Model** (k = 3; tau<sup>2</sup> estimator: REML)

logLik deviance AIC BIC AICc  
 7.3265 -14.6529 -10.6529 -13.2666 1.3471  
 tau<sup>2</sup> (estimated amount of total heterogeneity): 0 (SE = 0.0000)  
 tau (square root of estimated tau<sup>2</sup> value): 0  
 I<sup>2</sup> (total heterogeneity / total variability): 0.00%  
 H<sup>2</sup> (total variability / sampling variability): 1.00

*Test for Heterogeneity:*

Q(df = 2) = 0.9932, p-val = 0.6086

*Model Results:*

| estimate | se     | zval    | pval   | ci.lb   | ci.ub   |
|----------|--------|---------|--------|---------|---------|
| -0.0063  | 0.0027 | -2.3603 | 0.0183 | -0.0116 | -0.0011 |

Signif. codes: 0 '\*\*\*' 0.001 '\*\*' 0.01 '\*' 0.05 '.' 0.1 ' ' 1

**Sensitivity Analysis**

Estimated number of missing studies on the right side: 2 (SE = 1.4881)  
 Random-Effects Model (k = 5; tau<sup>2</sup> estimator: REML)  
 tau<sup>2</sup> (estimated amount of total heterogeneity): 0 (SE = 0.0000)  
 tau (square root of estimated tau<sup>2</sup> value): 0  
 I<sup>2</sup> (total heterogeneity / total variability): 0.00%  
 H<sup>2</sup> (total variability / sampling variability): 1.00

*Test for Heterogeneity:*

Q(df = 4) = 2.4687, p-val = 0.6502

*Model Results:*

| estimate | se     | zval    | pval   | ci.lb   | ci.ub   |
|----------|--------|---------|--------|---------|---------|
| -0.0050  | 0.0024 | -2.0518 | 0.0402 | -0.0098 | -0.0002 |

Signif. codes: 0 '\*\*\*' 0.001 '\*\*' 0.01 '\*' 0.05 '.' 0.1 ' ' 1

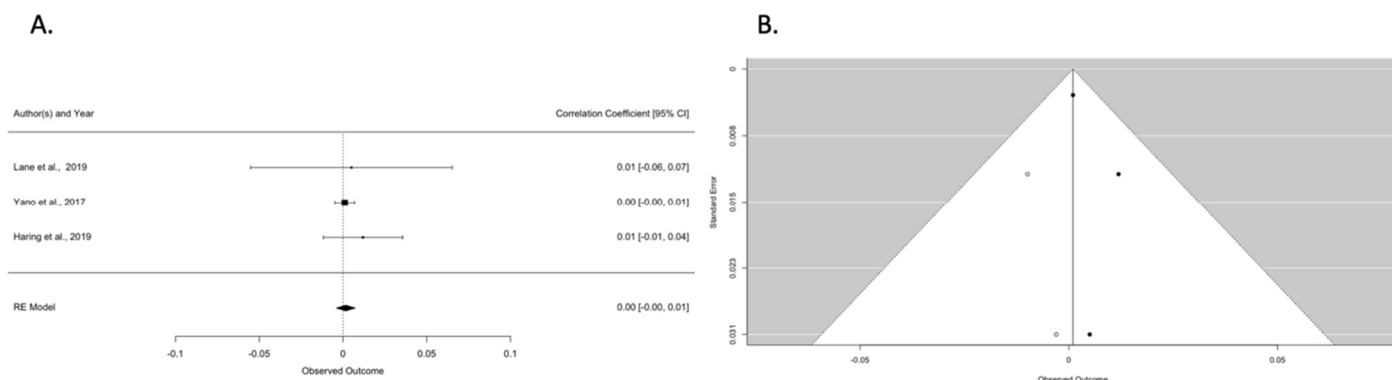

**Figure S11.** Association between DBP variability and hippocampal volume from longitudinal studies. A. Forest plots; B. Sensitivity Analysis; trim and fill.

**Random-Effects Model (k = 3; tau^2 estimator: REML)**

```

logLik deviance AIC BIC AICc
6.1862 -12.3723 -8.3723 -10.9860 3.6277
tau^2 (estimated amount of total heterogeneity): 0 (SE = 0.0001)
tau (square root of estimated tau^2 value): 0
I^2 (total heterogeneity / total variability): 0.00%
H^2 (total variability / sampling variability): 1.00
    
```

*Test for Heterogeneity:*

Q(df = 2) = 0.7764, p-val = 0.6783

*Model Results:*

```

estimate se zval pval ci.lb ci.ub
0.0017 0.0029 0.5731 0.5666 -0.0040 0.0073
Signif. codes: 0 '***' 0.001 '**' 0.01 '*' 0.05 '.' 0.1 ' ' 1
Estimated number of missing studies on the left side: 2 (SE = 1.4881)
Random-Effects Model (k = 5; tau^2 estimator: REML)
tau^2 (estimated amount of total heterogeneity): 0 (SE = 0.0001)
tau (square root of estimated tau^2 value): 0
I^2 (total heterogeneity / total variability): 0.00%
H^2 (total variability / sampling variability): 1.00
    
```

*Test for Heterogeneity:*

Q(df = 4) = 1.6569, p-val = 0.7985

*Model Results:*

```

estimate se zval pval ci.lb ci.ub
0.0010 0.0028 0.3562 0.7217 -0.0045 0.0065
Signif. codes: 0 '***' 0.001 '**' 0.01 '*' 0.05 '.' 0.1 ' ' 1
    
```

**A.1 SBP and volume of White matter lesions (age < 75 years)**

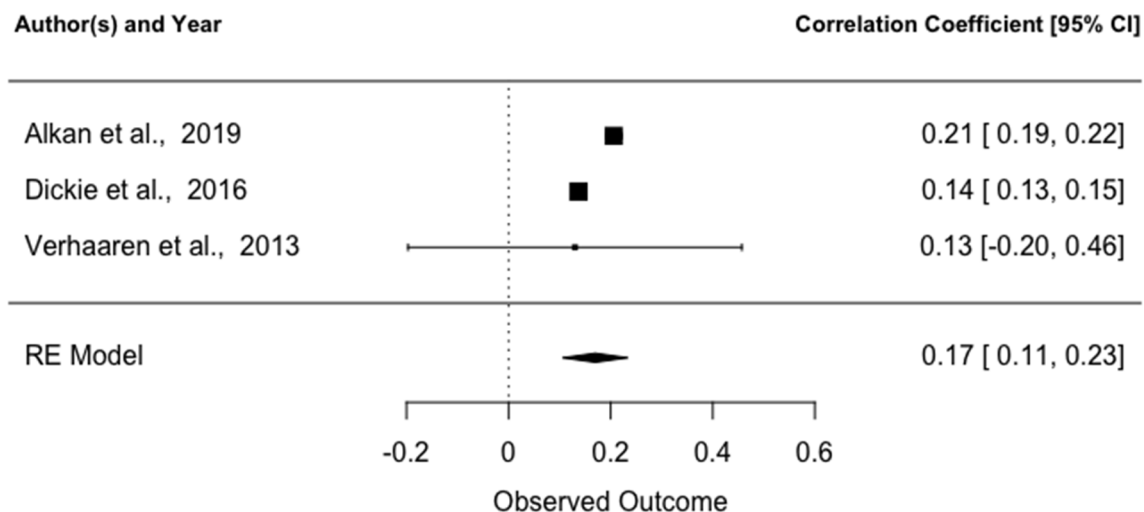

**A.2 SBP and volume of White matter lesions (age > 75 years)**

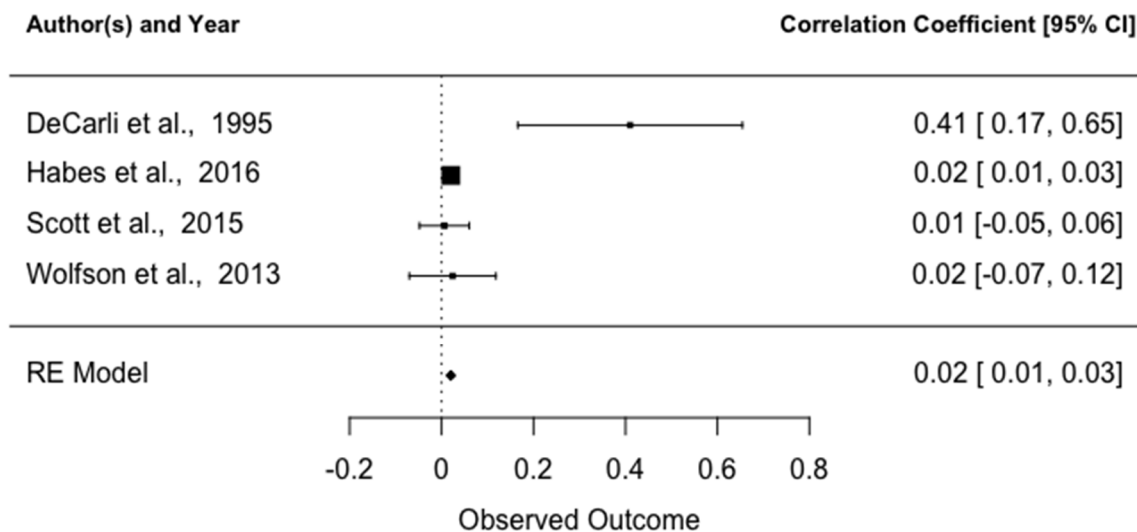

**Figure S12.** The Forest plots show the association between SBP and white matter lesions in elderly below or above ~75 years. Given the small number of studies these results should be interpreted with caution. However, the pattern of results appears to indicate that effects are consistent below in younger individuals (mean weighted age ~72 years). In contrast, while still significant in older individuals (mean weighted age 80.6 years) the effect appears much reduced in this age group.

**References**

1. Burns, J.M.; Church, J.A.; Johnson, D.K.; Xiong, C.; Marcus, D.; Fotenos, A.F.; Snyder, A.Z.; Morris, J.C.; Buckner, R.L. White matter lesions are prevalent but differentially related with cognition in aging and early Alzheimer

- disease. *Arch. Neurol.* **2005**, *62*, 1870–1876, doi:10.1001/archneur.62.12.1870.
2. den Heijer, T.; Launer, L.J.; Prins, N.D.; van Dijk, E.J.; Vermeer, S.E.; Hofman, A.; Koudstaal, P.J.; Breteler, M.M. Association between blood pressure, white matter lesions, and atrophy of the medial temporal lobe. *Neurology* **2005**, *64*, 263–267, doi:10.1212/01.Wnl.0000149641.55751.2e.
  3. Gattringer, T.; Enzinger, C.; Ropele, S.; Gorani, F.; Petrovic, K.E.; Schmidt, R.; Fazekas, F. Vascular risk factors, white matter hyperintensities and hippocampal volume in normal elderly individuals. *Dement. Geriatr. Cogn. Disord.* **2012**, *33*, 29–34, doi:10.1159/000336052.
  4. Sabayan, B.; Wijsman, L.W.; Foster-Dingley, J.C.; Stott, D.J.; Ford, I.; Buckley, B.M.; Sattar, N.; Jukema, J.W.; van Osch, M.J.; van der Grond, J. et al. Association of visit-to-visit variability in blood pressure with cognitive function in old age:prospective cohort study. *BMJ(Clinical Res. ed.)* **2013**, *347*, f4600.
  5. Firbank, M.J.; Wiseman, R.M.; Burton, E.J.; Saxby, B.K.; O'Brien, J.T.; Ford, G.A. Brain atrophy and white matter hyperintensity change in older adults and relationship to blood pressure. *J. Neurol.* **2007**, doi:10.1007/s00415-006-0238-4.
  6. Ikram, M.A.; Vrooman, H.A.; Vernooij, M.W.; van der Lijn, F.; Hofman, A.; van der Lugt, A.; Niessen, W.J.; Breteler, M.M.B. Brain tissue volumes in the general elderly population. The Rotterdam Scan Study. *Neurobiol. Aging* **2008**, *29*, 882–890, doi:10.1016/j.neurobiolaging.2006.12.012.
  7. van Velsen, E.F.S.; Vernooij, M.W.; Vrooman, H.A.; van der Lugt, A.; Breteler, M.M.B.; Hofman, A.; Niessen, W.J.; Ikram, M.A. Brain cortical thickness in the general elderly population: The Rotterdam Scan Study. *Neurosci. Lett.* **2013**, doi:10.1016/j.neulet.2013.06.063.
  8. Wiseman, R.M.; Saxby, B.K.; Burton, E.J.; Barber, R.; Ford, G.A.; Brien, J.T.O. Hippocampal atrophy , whole brain volume , and white matter lesions in older hypertensive subjects. **2004**.
  9. Hajjar, I.; Zhao, P.; Alsop, D.; Abduljalil, A.; Selim, M.; Novak, P.; Novak, V. Association of blood pressure elevation and nocturnal dipping with brain atrophy Perfusion and Functional Measures in Stroke and Nonstroke Individuals. *Am. J. Hypertens.* **2010**, *23*, 17–23, doi:10.1038/ajh.2009.187.
  10. Yano, Y.; Reis, J.P.; Levine, D.A.; Bryan, R.N.; Viera, A.J.; Shimbo, D.; Tedla, Y.G.; Allen, N.B.; Schreiner, P.J.; Bancks, M.P.; et al. Visit-to-Visit Blood Pressure Variability in Young Adulthood and Hippocampal Volume and Integrity at Middle Age. *Hypertens. (Dallas, Tex. 1979)* **2017**, *70*, 1091–1098, doi:10.1161/hypertensionaha.117.10144.
  11. Trotman, G.P.; Williams, S.E.; Ginty, A.T.; Gianaros, P.J. Increased stressor - evoked cardiovascular reactivity is associated with reduced amygdala and hippocampus volume. **2019**, doi:10.1111/psyp.13277.
  12. Schaare, H.L.; Kharabian Masouleh, S.; Beyer, F.; Kumral, D.; Uhlig, M.; Reinelt, J.D.; Reiter, A.M.F.; Lampe, L.; Babayan, A.; Al, E. Association of peripheral blood pressure with gray matter volume in 19- to 40-year-old adults. *Neurology* **2019**, doi:10.1212/WNL.0000000000006947.
  13. Lane, C.A.; Barnes, J.; Nicholas, J.M.; Sudre, C.H.; Cash, D.M.; Parker, T.D.; Malone, I.B.; Lu, K.; James, S.-N.;

- Keshavan, et al. Associations between blood pressure across adulthood and late-life brain structure and pathology in the neuroscience substudy of the 1946 British birth cohort (Insight 46): an epidemiological study. *Lancet. Neurol.* **2019**, *18*, 942–952, doi:10.1016/S1474-4422(19)30228-5.
14. Launer, L.J.; Lewis, C.E.; Schreiner, P.J.; Sidney, S.; Battapady, H.; Jacobs, D.R.; Lim, K.O.; D'Esposito, M.; Zhang, Q.; Reis, J.; et al. Vascular factors and multiple measures of early brain health: CARDIA Brain MRI Study. *PLoS One* **2015**, *10*, e0122138, doi:10.1371/journal.pone.0122138.
  15. Swan, G.E.; DeCarli, C.; Miller, B.L.; Reed, T.; Wolf, P.A.; Jack, L.M.; Carmelli, D. Association of midlife blood pressure to late-life cognitive decline and brain morphology. *Neurology* **1998**, doi:10.1212/WNL.51.4.986.
  16. McNeil, C.J.; Myint, P.K.; Sandu, A.L.; Potter, J.F.; Staff, R.; Whalley, L.J.; Murray, A.D. Increased diastolic blood pressure is associated with MRI biomarkers of dementia-related brain pathology in normative ageing. *Age Ageing* **2018**, *47*, 95–100, doi:10.1093/ageing/afx102.
  17. Allan, C.L.; Zsoldos, E.; Filippini, N.; Sexton, C.E.; Topiwala, A.; Valkanova, V.; Singh-Manoux, A.; Tabák, A.G.; Shipley, M.J.; Mackay, C.; et al. Lifetime hypertension as a predictor of brain structure in older adults: Cohort study with a 28-year follow-up. *Br. J. Psychiatry* **2015**, *206*, 308–315, doi:10.1192/bjp.bp.114.153536.
  18. Goldstein, I.B.; Bartzokis, G.; Guthrie, D.; Shapiro, D. Ambulatory blood pressure and the brain: A 5-year follow-up. *Neurology* **2005**, *64*, 1846–1852, doi:10.1212/01.WNL.0000164712.24389.BB.
  19. Tsao, C.W.; Himali, J.J.; Beiser, A.S.; Larson, M.G.; DeCarli, C.; Mitchell, G.F. Association of arterial stiffness with progression of subclinical brain and cognitive disease. **2016**, 619–626.
  20. Hoogendam, Y.Y.; van der Geest, J.N.; van der Lijn, F.; van der Lugt, A.; Niessen, W.J.; Krestin, G.P.; Hofman, A.; Vernooij, M.W.; Breteler, M.M.; Ikram, M.A. Determinants of cerebellar and cerebral volume in the general elderly population. *Neurobiol. Aging* **2012**, *33*, 2774–2781, doi:10.1016/j.neurobiolaging.2012.02.012.
  21. Nation, D.A.; Preis, S.R.; Beiser, A.; Bangen, K.J.; Delano-Wood, L.; Lamar, M.; Libon, D.J.; Seshadri, S.; Wolf, P.A.; Au, R. Pulse Pressure Is Associated With Early Brain Atrophy and Cognitive Decline: Modifying Effects of APOE-epsilon4. *Alzheimer Dis. Assoc. Disord.* **2016**, *30*, 210–215, doi:10.1097/wad.0000000000000127.
  22. Pase, M.P.; Beiser, A.; Aparicio, H.; DeCarli, C.; Vasan, R.S.; Murabito, J.; Seshadri, S. Interarm differences in systolic blood pressure and the risk of dementia and subclinical brain injury. *Alzheimers. Dement.* **2016**, *12*, 438–445, doi:10.1016/j.jalz.2015.09.006.
  23. Haring, B.; Liu, J.; Salmoirago-Blotcher, E.; Hayden, K.M.; Sarto, G.; Roussouw, J.; Kuller, L.H.; Rapp, S.R.; Wassertheil-Smoller, S. Blood pressure variability and brain morphology in elderly women without cardiovascular disease. *Neurology* **2019**, *92*, E1284–E1297, doi:10.1212/WNL.00000000000007135.
  24. Glodzik, L.; Rusinek, H.; Pirraglia, E.; McHugh, P.; Tsui, W.; Williams, S.; Cummings, M.; Li, Y.; Rich, K.; Randall, C.; et al. Blood pressure decrease correlates with tau pathology and memory decline in hypertensive elderly. *Neurobiol. Aging* **2014**, *35*, 64–71, doi:10.1016/j.neurobiolaging.2013.06.011.
  25. Bender, A.R.; Raz, N. Age-related differences in memory and executive functions in healthy APOE varepsilon4

- carriers: the contribution of individual differences in prefrontal volumes and systolic blood pressure. *Neuropsychologia* **2012**, *50*, 704–714, doi:10.1016/j.neuropsychologia.2011.12.025.
26. Suzuki, H.; Gao, H.; Bai, W.; Evangelou, E.; Glocker, B.; O'Regan, D.P.; Elliott, P.; Matthews, P.M. Abnormal brain white matter microstructure is associated with both pre-hypertension and hypertension. *PLoS One* **2017**, *12*.
27. Brickman, A.M.; Reitz, C.; Luchsinger, J.A.; Manly, J.J.; Schupf, N.; Muraskin, J.; DeCarli, C.; Brown, T.R.; Mayeux, R. Long-term blood pressure fluctuation and cerebrovascular disease in an elderly cohort. *Arch. Neurol.* **2010**, *67*, 564–569, doi:10.1001/archneurol.2010.70.
28. Paganini-Hill, A.; Bryant, N.; Corrada, M.M.; Greenia, D.E.; Fletcher, E.; Singh, B.; Florioli, D.; Kawas, C.H.; Fisher, M.J. Blood Pressure Circadian Variation, Cognition and Brain Imaging in 90+ Year-Olds. *Front. Aging Neurosci.* **2019**, *11*, 54, doi:10.3389/fnagi.2019.00054.
29. Heijer, T. Den; Lijn, F. Van Der; Ikram, A.; Koudstaal, P.J.; Lugt, A. Van Der; Krestin, G.P.; Vrooman, H.A.; Hofman, A.; Niessen, W.J.; Breteler, M.M.B. Vascular risk factors , apolipoprotein E , and hippocampal decline on magnetic resonance imaging over a 10-year follow-up. *Alzheimer's Dement.* **2012**, *8*, 417–425, doi:10.1016/j.jalz.2011.07.005.
30. Muller, M.; Sigurdsson, S.; Kjartansson, O.; Aspelund, T.; Lopez, O.L.; Jonnson, P. V.; Harris, T.B.; Van Buchem, M.; Gudnason, V.; Launer, L.J. Joint effect of mid- and late-life blood pressure on the brain: The AGES-Reykjavik Study. *Neurology* **2014**, *82*, 2187–2195, doi:10.1212/WNL.0000000000000517.
31. Korf, E.S.; White, L.R.; Scheltens, P.; Launer, L.J. Midlife blood pressure and the risk of hippocampal atrophy- The Honolulu Asia Aging Study. *Hypertens. (Dallas, Tex. 1979)* **2004**, *44*, 29–34, doi:10.1161/01.HYP.0000132475.32317.bb.
32. Scott, J.A.; Braskie, M.N.; Tosun, D.; Thompson, P.M.; Weiner, M.; DeCarli, C.; Carmichael, O.T. Cerebral amyloid and hypertension are independently associated with white matter lesions in elderly. *Front. Aging Neurosci.* **2015**, *7*, doi:10.3389/fnagi.2015.00221.
33. Wolfson, L.; Wakefield, D.B.; Moscufo, N.; Kaplan, R.F.; Hall, C.B.; Schmidt, J.A.; Guttmann, C.R.G.; White, W.B. Rapid buildup of brain white matter hyperintensities over 4 years linked to ambulatory blood pressure, mobility, cognition, and depression in old persons. *Journals Gerontol. - Ser. A Biol. Sci. Med. Sci.* **2013**, *68*, 1387–1394, doi:10.1093/gerona/glt072.
34. White, W.B.; Wolfson, L.; Wakefield, D.B.; Hall, C.B.; Campbell, P.; Moscufo, N.; Schmidt, J.; Kaplan, R.F.; Pearlson, G.; Guttmann, C.R. Average daily blood pressure, not office blood pressure, is associated with progression of cerebrovascular disease and cognitive decline in older people. *Circulation* **2011**, *124*, 2312–2319, doi:10.1161/circulationaha.111.037036.
35. Wardlaw, J.M.; Allerhand, M.; Doubal, F.N.; Hernandez, M.V.; Morris, Z.; Gow, A.J.; Bastin, M.; Starr, J.M.; Dennis, M.S.; Deary, I.J. Vascular risk factors , large-artery atheroma , and brain white matter hyperintensities. **2014**,

- 1331–1338.
36. Alkan, E.; Taporoski, T.P.; Sterr, A.; von Schantz, M.; Vallada, H.; Krieger, J.E.; Pereira, A.C.; Alvim, R.; Horimoto, A.R.V.R.; Pompéia, S.; et al. Metabolic syndrome alters relationships between cardiometabolic variables, cognition and white matter hyperintensity load. *Sci. Rep.* **2019**, *9*, 1–9, doi:10.1038/s41598-019-40630-6.
37. Cherbuin, N.; Mortby, M.E.; Janke, A.L.; Sachdev, P.S.; Abhayaratna, W.P.; Anstey, K.J. Blood Pressure, Brain Structure, and Cognition: Opposite Associations in Men and Women. *Am. J. Hypertens.* **2015**, *28*, 225–231, doi:10.1093/ajh/hpu120.
38. DeCarli, C.; Murphy, D.G.; Trinh, M.; Grady, C.L.; Haxby, J. V.; Gillette, J.A.; Salerno, J.A.; Gonzales-Aviles, A.; Horwitz, B.; Rapoport, S.I.; et al. The effect of white matter hyperintensity volume on brain structure, cognitive performance, and cerebral metabolism of glucose in 51 healthy adults. *Neurology* **1995**, *45*, 2077–2084.
39. de Jong, L.W.; Forsberg, L.E.; Vidal, J.S.; Sigurdsson, S.; Zijdenbos, A.P.; Garcia, M.; Eiriksdottir, G.; Gudnason, V.; van Buchem, M.A.; Launer, L.J. Different susceptibility of medial temporal lobe and basal ganglia atrophy rates to vascular risk factors. *Neurobiol. Aging* **2014**, *35*, 72–78, doi:10.1016/j.neurobiolaging.2013.07.009.
40. Dickie, D.A.; Ritchie, S.J.; Cox, S.R.; Sakka, E.; Royle, N.A.; Aribisala, B.S.; Valdés Hernández, M. del C.; Maniega, S.M.; Pattie, A.; Corley, J.; et al. Vascular risk factors and progression of white matter hyperintensities in the Lothian Birth Cohort 1936. *Neurobiol. Aging* **2016**, *42*, 116–123, doi:10.1016/j.neurobiolaging.2016.03.011.
41. Gianaros, P.J.; Greer, P.J.; Ryan, C.M.; Jennings, J.R. Higher blood pressure predicts lower regional grey matter volume: Consequences on short-term information processing. *Neuroimage* **2006**, *31*, 754–765, doi:10.1016/j.neuroimage.2006.01.003.
42. Goldstein, I.B.; Bartzokis, G.; Guthrie, D.; Shapiro, D. Ambulatory blood pressure and brain atrophy in the healthy elderly. *Neurology* **2002**, *59*, 713–719.
43. Habes, M.; Erus, G.; Toledo, J.B.; Zhang, T.; Bryan, N.; Launer, L.J.; Rosseel, Y.; Janowitz, D.; Doshi, J.; Auwera, S. Van Der; et al. White matter hyperintensities and imaging patterns of brain ageing in the general population. **2016**, 1164–1179, doi:10.1093/brain/aww008.
44. Jeerakathil, T.; Wolf, P.A.; Beiser, A.; Massaro, J.; Seshadri, S.; D’Agostino, R.B.; DeCarli, C. Stroke risk profile predicts white matter hyperintensity volume-The Framingham Study. *Stroke* **2004**, *35*, 1857–1861, doi:10.1161/01.Str.0000135226.53499.85.
45. Kern, K.C.; Wright, C.B.; Bergfield, K.L.; Fitzhugh, M.C.; Sacco, R.L.; Stern, Y.; Decarli, C.S.; Alexander, G.E. Blood Pressure Control in Aging Predicts Cerebral Atrophy Related to Small-Vessel White Matter Lesions. **2017**, *9*, 1–10, doi:10.3389/fnagi.2017.00132.
46. Kobuch, S.; Fatouleh, R.H.; Macefield, J.M.; Henderson, L.A.; Macefield, V.G. Differences in regional grey matter volume of the brain are related to mean blood pressure and muscle sympathetic nerve activity in normotensive humans. *J. Hypertens.* **2020**, *38*, 303–313, doi:10.1097/HJH.0000000000002243.
47. Mahinrad, S.; Kurian, S.; Garner, C.R.; Sedaghat, S.; Nemeth, A.J.; Moscufo, N.; Higgins, J.P.; Jacobs, D.R.;

- Hausdorff, J.M.; Lloyd-Jones, D.M.; et al. Cumulative Blood Pressure Exposure During Young Adulthood and Mobility and Cognitive Function in Midlife. *Circulation* **2019**, doi:10.1161/circulationaha.119.042502.
48. Muller, M.; Sigurdsson, S.; Kjartansson, O.; Gunnarsdottir, I.; Thorsdottir, I.; Harris, T.B.; van Buchem, M.; Gudnason, V.; Launer, L.J. Late-life brain volume: A life-course approach. The AGES-Reykjavik study. *Neurobiol. Aging* **2016**, *41*, 86–92, doi:10.1016/j.neurobiolaging.2016.02.012.
49. Power, M.C.; Schneider, A.L.C.; Wruck, L.; Griswold, M.; Coker, L.H.; Alonso, A.; Jack, C.R.; Knopman, D.; Mosley, T.H.; Gottesman, R.F. Life-course blood pressure in relation to brain volumes. *Alzheimer's Dement.* **2016**, doi:10.1016/j.jalz.2016.03.012.
50. Schaare, H.L.; Kharabian Masouleh, S.; Beyer, F.; Kumral, D.; Uhlig, M.; Reinelt, J.D.; Reiter, A.M.F.; Lampe, L.; Babayan, A.; Erbey, M.; et al. Association of peripheral blood pressure with gray matter volume in 19- to 40-year-old adults. *Neurology* **2019**, *92*, E758–E773, doi:10.1212/WNL.0000000000006947.
51. Spartano, N.L.; Himali, J.J.; Beiser, A.S.; Lewis, G.D.; DeCarli, C.; Vasan, R.S.; Seshadri, S. Midlife exercise blood pressure, heart rate, and fitness relate to brain volume 2 decades later. *Neurology* **2016**, *86*, 1313–1319, doi:10.1212/wnl.0000000000002415.
52. Taki, Y.; Goto, R.; Evans, A.; Zijdenbos, A.; Neelin, P.; Lerch, J.; Sato, K.; Ono, S.; Kinomura, S.; Nakagawa, M.; et al. Voxel-based morphometry of human brain with age and cerebrovascular risk factors. *Neurobiol. Aging* **2004**, *25*, 455–463, doi:10.1016/j.neurobiolaging.2003.09.002.
53. Taki, Y.; Thyreau, B.; Kinomura, S.; Sato, K.; Goto, R.; Wu, K.; Kawashima, R.; Fukuda, H. A longitudinal study of age- and gender-related annual rate of volume changes in regional gray matter in healthy adults. *Hum. Brain Mapp.* **2013**, *34*, 2292–2301, doi:10.1002/hbm.22067.
54. Verhaaren, B.F.J.; Vernooij, M.W.; De Boer, R.; Hofman, A.; Niessen, W.J.; Van Der Lugt, A.; Ikram, M.A. High blood pressure and cerebral white matter lesion progression in the general population. *Hypertension* **2013**, doi:10.1161/HYPERTENSIONAHA.111.00430.
